## PROFESSIONAL NOTES

The Organization of American States is sponsoring an international competition in honor of the Bicentennial of the Independence of the United States. Two topics have been selected for this competition: "Participation of Latin America in the Independence of the U.S.A.," and "Influence of the Independence of the U.S.A. in the Formation of Latin American Nationalities." The winning manuscripts in each category will receive a prize of U.S. \$5,000.00.

Persons interested in Topic One should send their inquiries to the Comisión de Historia, Instituto Panamericano de Geografía e Historia, Avenida Libertador, esq., Avenida Las Acacias, Edificio Las Vegas, Piso 1o. Of. 1-D, Caracas 105, Venezuela. Persons interested in Topic Two should address their inquiries to Professor Roberto Esquenazi-Mayo, Director, Institute for International Studies, 1034 Oldfather Hall, University of Nebraska—Lincoln, Lincoln, Nebraska, 68508, U.S.A.

\* \* \* \* \*

The Clarence H. Haring Prize is awarded every five years to that Latin American who, in the opinion of the committee, has published the most outstanding book in Latin American history during the preceding five years. The prize carries a cash award of \$500.00. Books published since June 1, 1971 will be eligible for the prize in 1976. There is no language limitation on works submitted. Further inquiries should be directed to the Office of the Executive Director, American Historical Association, 400 A Street, Southeast, Washington, D.C., 20003.

\* \* \* \* \*

The Social Science Research Council and the American Council of Learned Societies announces fellowships for doctoral dissertation research and special preparatory training in the social sciences and the humanities on topics related to aspects of cultural, economic, political, social, and scientific development in Latin America or the Caribbean. Recipients of fellowships are required to affiliate with a university, research institute, or other appropriate institution in the country where they will be conducting research. Further information can be obtained from: Social Science Research Council, Fellowships and Grants, 605 Third Avenue, New York, New York, 10016.

\* \* \* \* \*

Postdoctoral Grants for research on foreign areas, sponsored by the Social Science Research Council and the American Council of Learned Societies, are being offered for Latin America and the Caribbean. These grants are awarded to social scientists and humanists of any country for research related to cultural, economic, political, social, or scientific development in Latin America or the Caribbean area in the nineteenth or twentieth centuries. Contact: Social Science Research Council, Fellowships and Grants, 605 Third Avenue, New York, New York, 10016.

\* \* \* \* \*

The 1976 Conference of the Society of Latin American Studies (Great Britain), is to be held at the University of Leicester from the 26th to the 28th March, 1976. There will be five papers in the historical section on the theme of "Settlement and Social Structure in Latin America 1700-1850." Further information may be obtained from Rory M. Miller, School of History, University of Liverpool, P.O. Box 147, Liverpool, L69 3BX, England.
